# Supplementary material for: Enhanced fluorescence properties of carbon dots in polymer films
Source: Royal Society of Chemistry journal article supplement (doi:10.1039/c6tc01932c), 2016-01-01

## Supplementary Information

### Enhanced Fluorescence Properties of Carbon Dots in Polymer Films

Yamin Liu,<sup>a</sup> Ping Wang,<sup>a</sup> K. A. Shiral Fernando,<sup>b,\*</sup> Gregory E. LeCroy,<sup>a</sup> Halidan Maimaiti,<sup>a</sup> Barbara A. Harruff-Miller,<sup>b</sup> William K. Lewis,<sup>c</sup> Christopher E. Bunker,<sup>c,\*</sup> Zhi-Ling Hou,<sup>a</sup> Ya-Ping Sun<sup>a,\*</sup>

<sup>a</sup> Department of Chemistry and Laboratory for Emerging Materials and Technology, Clemson University, Clemson, South Carolina 29634. \*E-mail: yapingsun@clemson.edu.

<sup>b</sup> University of Dayton Research Institute, Sensors Technology Office, Dayton, Ohio 45469. \*E-mail: KAShiral.Fernando@udri.udayton.edu.

<sup>c</sup> Air Force Research Laboratory, Propulsion Directorate, Wright-Patterson Air Force Base, Ohio 45433. \*E-mail: christopher.bunker@wpafb.af.mil.

#### The Schematic and Photo Illustration for the Specifically Designed and Constructed Film Sample Holder:

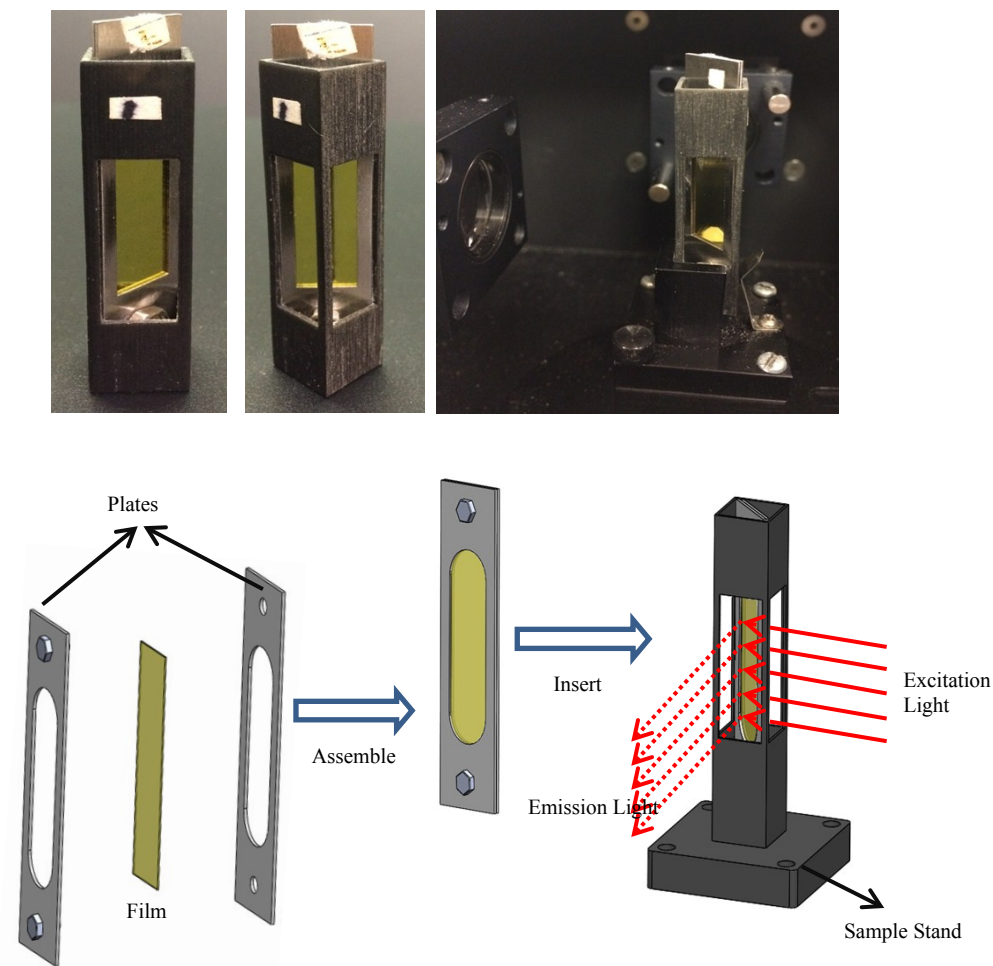

Supplement: c6tc01932c1.pdf [file c6tc01932c1.pdf]
